# Supplementary material for: Characterization and Classification of Direct and Commercial Strawberry Beverages Using Absorbance–Transmission and Fluorescence Excitation–Emission Matrix Technique
Source: MDPI journal article supplement (doi:10.3390/foods11142143), 2022-07-20
Supplement: s1 [file s1]

Table S1. Characteristics of the studied samples.

|            |                                                                                                                                 |
|------------|---------------------------------------------------------------------------------------------------------------------------------|
| <b>D1</b>  | Azja, 2018                                                                                                                      |
| <b>D2</b>  | Azja, 2018                                                                                                                      |
| <b>D3</b>  | Azja, 2019                                                                                                                      |
| <b>D4</b>  | Azja, 2019                                                                                                                      |
| <b>D5</b>  | Azja, 2019                                                                                                                      |
| <b>D6</b>  | Florence, 2018                                                                                                                  |
| <b>D7</b>  | Florence, 2018                                                                                                                  |
| <b>D8</b>  | Florence, 2019                                                                                                                  |
| <b>D9</b>  | Florentina, 2019                                                                                                                |
| <b>D10</b> | Honeoye, 2018                                                                                                                   |
| <b>D11</b> | Korona, 2018                                                                                                                    |
| <b>D12</b> | Romina, 2018                                                                                                                    |
| <b>D13</b> | Rumba, 2018                                                                                                                     |
| <b>D14</b> | Rumba, 2019                                                                                                                     |
| <b>D15</b> | Rumba, 2019                                                                                                                     |
| <b>P1</b>  | Juice:100% strawberry puree juice                                                                                               |
| <b>P2</b>  | Juice: 100% strawberry juice                                                                                                    |
| <b>P3</b>  | Juice: 50% juice made of strawberries, 50% sugar                                                                                |
| <b>P4</b>  | Juice: Organic strawberry juice, 50% juice made of strawberries, 50% sugar                                                      |
| <b>P5</b>  | Nectar: 65% juice, made of strawberries, water, sugar                                                                           |
| <b>P6</b>  | Drink: 40% strawberry puree juice, water, sugar, an acidity regulator, aroma, antioxidant                                       |
| <b>P7</b>  | Juice: 20% strawberry juice, 80% apple juice                                                                                    |
| <b>P8</b>  | Juice: 50% strawberry juice, 50% apple juice                                                                                    |
| <b>P9</b>  | Drink/juice: Strawberry 31%, Bananas 24%, Apples 23%, Oranges 16%, Aronia 3%, Raspberries 3%                                    |
| <b>P10</b> | Drink/juice: 19% strawberry puree, 9% apple, 1% chokeberry, 1% black currant, aromas                                            |
| <b>P11</b> | Syrup: 51% juice, made of strawberries, sugar                                                                                   |
| <b>P12</b> | Syrup: 100% strawberry juice                                                                                                    |
| <b>P13</b> | Syrup: 100% strawberry low-sugar syrup, 64% strawberry juice, 34% sugar                                                         |
| <b>P14</b> | Syrup: 53% juice, made of strawberries, sugar, citric acid                                                                      |
| <b>P15</b> | Syrup: 53% juice made of strawberries, sugar, citric acid                                                                       |
| <b>P16</b> | Syrup: 50% juice, made of strawberries, 50% sugar                                                                               |
| <b>P17</b> | Syrup: 1.85% of concentrated strawberry juice, an acidity regulator, water, aroma, antioxidant, sugar                           |
| <b>P18</b> | Syrup: 1.8% of concentrated strawberry juice, an acidity regulator, water, aroma, antioxidant, sugar, other concentrated juices |
| <b>P19</b> | Syrup: 0.25% of concentrated strawberry juice, an acidity regulator, water, other juices                                        |
| <b>P20</b> | Syrup: 0.2% of concentrated strawberry juice, an acidity regulator, water, aroma, antioxidant, sugar, other concentrated juices |

Table S2.

Characteristics of PARAFAC models of EEMs of strawberry beverages

| Number of components | Spectral profiles of components<br>$\lambda_{\text{ex}}/\lambda_{\text{em}}$ (nm) | Explained variance (%) | Core consistency | Split half analysis - similarity measure (%) |
|----------------------|-----------------------------------------------------------------------------------|------------------------|------------------|----------------------------------------------|
| 3                    | 275, 365/345<br>277,322/310<br>310,385/435                                        | 98.627                 | 92               | 1.3                                          |
| 4                    | 275/345 nm<br>275/318 nm<br>305 nm/425 nm<br>270, 365 nm/470 nm                   | 99.179                 | 93               | 76.3                                         |
| 5                    | 275/345<br>277/310<br>316/333<br>305/425<br>270, 365/465                          | 99.348                 | 91               | 0.4                                          |
